# Supplementary material for: Raltegravir with Optimized Background Therapy for Resistant HIV-1 Infection
Source: Atypon-hosted journal article supplement (doi:10.1056/nejmoa0708975), 2008-07-23
Supplement: nejm_steigbigel_339sa2.pdf [file nejm_steigbigel_339sa2.pdf]

## Supplementary Appendix 2

This appendix has been provided by the authors to give readers additional information about their work.

Supplement to: Steigbigel RT, Cooper DA, Kumar PN, et al. Raltegravir with optimized background therapy for resistant HIV-1 infection. *N Engl J Med* 2008;359:339-54.

## **SUPPLEMENTARY METHODS**

### ***Detailed Safety Analysis Plan***

Frequencies of adverse events were not adjusted for duration of follow-up. Differences in the proportions of patients with adverse experiences in each treatment group during the double-blind phases of the combined studies were to be compared using the two-tailed Fisher exact test only for the following categories: (1) at least one clinical adverse event; (2) drug-related clinical adverse event; (3) serious clinical adverse event; (4) serious and drug-related clinical adverse event; (5) discontinued study therapy due to a clinical adverse event. Adjustments were not made for multiplicity.

The percentages of patients with specific adverse experiences by organ system were tabulated by treatment group. No formal hypothesis testing was prespecified for individual adverse experiences. Differences in the proportions of patients with adverse experiences in each treatment group during the double-blind phases of the combined studies were compared by organ system using asymptotic two-sided 95% confidence intervals calculated by the method of Miettinen and Nurminen to indicate the precision of the study sample estimates of treatment differences for adverse experiences for each organ system. Exclusion of zero from the confidence interval does not necessarily correspond with statistical significance at  $\alpha = 0.05$  computed from the Fisher exact test.

**Table A1. Details of Clinical AIDS-Defining Events during the Double-Blind Phases of the Combined BENCHMRK Studies**

| Study      | Treatment Group | AIDS-Defining Event <sup>†</sup>                                                     | Study Day of Initial Diagnosis | CD4 Count at Diagnosis <sup>‡</sup> (cells/mm <sup>3</sup> ) | CD4 Count at Baseline (cells/mm <sup>3</sup> ) | Δ CD4 Count: Diagnosis – Baseline (cells/mm <sup>3</sup> ) |
|------------|-----------------|--------------------------------------------------------------------------------------|--------------------------------|--------------------------------------------------------------|------------------------------------------------|------------------------------------------------------------|
| BENCHMRK-1 | Raltegravir     | Candidiasis, esophageal                                                              | 169                            | 104                                                          | 347                                            | -243                                                       |
|            | Raltegravir     | Lymphoma, immunoblastic; Candidiasis, esophageal                                     | 90                             | 139                                                          | 7                                              | 132                                                        |
|            | Raltegravir     | Encephalopathy, HIV-related                                                          | 62                             | 125                                                          | 10                                             | 115                                                        |
|            | Raltegravir     | Kaposi's sarcoma                                                                     | 29                             | 325                                                          | 6                                              | 319                                                        |
|            | Raltegravir     | Candidiasis, esophageal                                                              | 162                            | 449                                                          | 405                                            | 44                                                         |
|            | Raltegravir     | <i>Mycobacterium avium</i> complex (extrapulmonary); Lymphoma, immunoblastic         | 66                             | 5                                                            | 3                                              | 2                                                          |
|            | Raltegravir     | Kaposi's sarcoma; Herpes simplex: chronic ulcer(s) (greater than 1 month's duration) | 110                            | 12                                                           | 9                                              | 3                                                          |
|            | Raltegravir     | Candidiasis, esophageal                                                              | 63                             | 4                                                            | 2                                              | 2                                                          |
|            | Raltegravir     | Cryptococcal meningitis                                                              | 307                            | 183                                                          | 31                                             | 152                                                        |
|            | Raltegravir     | Cryptococcal meningitis                                                              | 76                             | 182                                                          | 12                                             | 170                                                        |
|            | Raltegravir     | Herpes simplex: chronic ulcer(s) (greater than 1 month's duration)                   | 134                            | 44                                                           | 2                                              | 42                                                         |

|         |                                                                                                                                        |     |    |    |    |
|---------|----------------------------------------------------------------------------------------------------------------------------------------|-----|----|----|----|
| Placebo | Candidiasis, esophageal                                                                                                                | 202 | 26 | 8  | 18 |
| Placebo | Candidiasis, esophageal*                                                                                                               | 9   | 6  | 7  | -1 |
| Placebo | Cytomegalovirus colitis;<br>Candidiasis, esophageal                                                                                    | 120 | 9  | 12 | -3 |
| Placebo | Candidiasis, esophageal                                                                                                                | 117 | 8  | 5  | 3  |
| Placebo | Candidiasis, esophageal;<br>Pneumonia, recurrent (other than<br><i>Mycobacterium avium</i> complex or<br><i>Pneumocystis carinii</i> ) | 19  | 41 | 22 | 19 |

---

|            |             |                                                                                                                                        |     |    |     |      |
|------------|-------------|----------------------------------------------------------------------------------------------------------------------------------------|-----|----|-----|------|
| BENCHMRK-2 | Raltegravir | Lymphoma, immunoblastic                                                                                                                | 64  | 33 | 46  | -13  |
|            | Raltegravir | Cytomegalovirus colitis;<br>Microsporidiosis                                                                                           | 52  | 9  | 6   | 3    |
|            | Raltegravir | Herpes simplex: esophagitis <sup>§</sup>                                                                                               | 63  | 46 | 198 | -152 |
|            | Raltegravir | Cryptococcal meningitis <sup>§</sup>                                                                                                   | 9   | 43 | 3   | 40   |
|            | Raltegravir | Pneumonia, recurrent (other than<br><i>Mycobacterium avium</i> complex or<br><i>Pneumocystis carinii</i> );<br>Candidiasis, esophageal | 48  | 4  | 3   | 1    |
|            | Raltegravir | Cytomegalovirus retinitis                                                                                                              | 43  | 11 | 1   | 10   |
|            | Placebo     | Cytomegalovirus retinitis;<br>Cryptosporidiosis, chronic intestinal<br>(greater than 1 month's duration)                               | 118 | 9  | 3   | 6    |

|         |                                                                                                          |     |     |    |     |
|---------|----------------------------------------------------------------------------------------------------------|-----|-----|----|-----|
| Placebo | Candidiasis, esophageal                                                                                  | 75  | 17  | 14 | 3   |
| Placebo | <i>Mycobacterium avium</i> complex<br>(extrapulmonary) <sup>§</sup> ;<br>Lymphoma, immunoblastic         | 117 | 180 | 63 | 117 |
| Placebo | <i>Salmonella</i> septicemia, recurrent                                                                  | 105 | 3   | 4  | -1  |
| Placebo | Cryptosporidiosis, chronic intestinal<br>(greater than 1 month's duration);<br>Cytomegalovirus retinitis | 66  | 5   | 13 | -8  |
| Placebo | Candidiasis, esophageal                                                                                  | 15  | 43  | 44 | -1  |

---

<sup>†</sup> Definitions of AIDS defining events were modeled on 1993 Revised Classification System for HIV Infection and Expanded Surveillance Case Definition for AIDS Among Adolescents and Adults and the list of AIDS-Defining Conditions used in AIDS Clinical Trials Group Protocol A5175.

<sup>‡</sup> The CD4 cell counts tabulated here were the available counts closest in time (but within  $\pm 4$  weeks) to diagnosis of the initial AIDS-defining event. If two counts were equidistant from the day of diagnosis, the later value was used.

\* This patient also had extrapulmonary infection with *Mycobacterium avium* complex prior to entering the study.

<sup>§</sup> Indicates that an investigator considered immune reconstitution syndrome near the time of diagnosis of an AIDS-defining event. Information regarding possible immune reconstitution syndrome was not actively solicited.

**Table A2. Proportion Of Patients With Serious Clinical Adverse Events During The Double-Blind Phases Of The Combined BENCHMRK Studies Regardless Of Incidence Or Causality**

|                                                         | <b>Raltegravir<br/>(N = 462)</b> |             | <b>Placebo<br/>(N = 237)</b> |             | <b>Difference<br/>[Raltegravir - Placebo]</b> |                   |
|---------------------------------------------------------|----------------------------------|-------------|------------------------------|-------------|-----------------------------------------------|-------------------|
| <b>Weeks of follow-up, median (range)</b>               | 57.4                             | (3.0, 72.0) | 37.6                         | (5.6, 72.9) |                                               |                   |
|                                                         | <b>n</b>                         | <b>(%)</b>  | <b>n</b>                     | <b>(%)</b>  | <b>% Difference</b>                           | <b>(95% C.I.)</b> |
| <b>Patients With One Or More Serious Adverse Events</b> | 82                               | (17.7)      | 45                           | (19.0)      | -1.2                                          | (-7.6, 4.6)       |
| <b>Blood And Lymphatic System Disorders</b>             | 4                                | (0.9)       | 4                            | (1.7)       | -0.8                                          | (-3.5, 0.8)       |
| Anaemia                                                 | 3                                | (0.6)       | 0                            | (0.0)       |                                               |                   |
| Febrile Neutropenia                                     | 0                                | (0.0)       | 1                            | (0.4)       |                                               |                   |
| Haemolytic Anaemia                                      | 1                                | (0.2)       | 0                            | (0.0)       |                                               |                   |
| Leukopenia                                              | 0                                | (0.0)       | 1                            | (0.4)       |                                               |                   |
| Neutropenia                                             | 1                                | (0.2)       | 2                            | (0.8)       |                                               |                   |
| <b>Cardiac Disorders</b>                                | 9                                | (1.9)       | 4                            | (1.7)       | 0.3                                           | (-2.5, 2.3)       |
| Acute Coronary Syndrome                                 | 2                                | (0.4)       | 0                            | (0.0)       |                                               |                   |
| Angina Pectoris                                         | 1                                | (0.2)       | 0                            | (0.0)       |                                               |                   |
| Cardiac Failure Congestive                              | 1                                | (0.2)       | 0                            | (0.0)       |                                               |                   |
| Cardio-Respiratory Arrest                               | 1                                | (0.2)       | 0                            | (0.0)       |                                               |                   |
| Coronary Artery Disease                                 | 1                                | (0.2)       | 1                            | (0.4)       |                                               |                   |
| Left Ventricular Dysfunction                            | 0                                | (0.0)       | 1                            | (0.4)       |                                               |                   |
| Mitral Valve Incompetence                               | 0                                | (0.0)       | 1                            | (0.4)       |                                               |                   |
| Myocardial Infarction                                   | 2                                | (0.4)       | 2                            | (0.8)       |                                               |                   |
| Pericarditis                                            | 1                                | (0.2)       | 0                            | (0.0)       |                                               |                   |
| Ventricular Tachycardia                                 | 1                                | (0.2)       | 0                            | (0.0)       |                                               |                   |
| <b>Ear And Labyrinth Disorders</b>                      | 0                                | (0.0)       | 2                            | (0.8)       | -0.8                                          | (-3.0, 0.0)       |
| Hypoacusis                                              | 0                                | (0.0)       | 1                            | (0.4)       |                                               |                   |
| Vertigo                                                 | 0                                | (0.0)       | 1                            | (0.4)       |                                               |                   |
| <b>Endocrine Disorders</b>                              | 1                                | (0.2)       | 0                            | (0.0)       | 0.2                                           | (-1.4, 1.2)       |
| Hyperthyroidism                                         | 1                                | (0.2)       | 0                            | (0.0)       |                                               |                   |
| <b>Eye Disorders</b>                                    | 1                                | (0.2)       | 1                            | (0.4)       | -0.2                                          | (-2.2, 0.8)       |
| Endophthalmitis                                         | 1                                | (0.2)       | 0                            | (0.0)       |                                               |                   |
| Uveitis                                                 | 0                                | (0.0)       | 1                            | (0.4)       |                                               |                   |
| <b>Gastrointestinal Disorders</b>                       | 12                               | (2.6)       | 4                            | (1.7)       | 0.9                                           | (-1.9, 3.1)       |
| Abdominal Pain                                          | 2                                | (0.4)       | 0                            | (0.0)       |                                               |                   |
| Anal Fistula                                            | 0                                | (0.0)       | 1                            | (0.4)       |                                               |                   |
| Ascites                                                 | 1                                | (0.2)       | 0                            | (0.0)       |                                               |                   |
| Diarrhoea                                               | 2                                | (0.4)       | 0                            | (0.0)       |                                               |                   |
| Gastritis                                               | 1                                | (0.2)       | 0                            | (0.0)       |                                               |                   |
| Hernial Eventration                                     | 1                                | (0.2)       | 0                            | (0.0)       |                                               |                   |
| Ileitis                                                 | 0                                | (0.0)       | 1                            | (0.4)       |                                               |                   |
| Lower Gastrointestinal Haemorrhage                      | 1                                | (0.2)       | 0                            | (0.0)       |                                               |                   |
| Nausea                                                  | 1                                | (0.2)       | 0                            | (0.0)       |                                               |                   |
| Pancreatitis                                            | 0                                | (0.0)       | 1                            | (0.4)       |                                               |                   |

|                                                             | Raltegravir<br>(N = 462) |       | Placebo<br>(N = 237) |       | Difference<br>[Raltegravir - Placebo] |             |
|-------------------------------------------------------------|--------------------------|-------|----------------------|-------|---------------------------------------|-------------|
|                                                             | n                        | (%)   | n                    | (%)   | % Difference                          | (95% C.I.)  |
| Rectal Haemorrhage                                          | 1                        | (0.2) | 0                    | (0.0) |                                       |             |
| Rectal Stenosis                                             | 0                        | (0.0) | 1                    | (0.4) |                                       |             |
| Small Intestinal Obstruction                                | 1                        | (0.2) | 0                    | (0.0) |                                       |             |
| Upper Gastrointestinal Haemorrhage                          | 1                        | (0.2) | 0                    | (0.0) |                                       |             |
| Varices Oesophageal                                         | 1                        | (0.2) | 0                    | (0.0) |                                       |             |
| Vomiting                                                    | 1                        | (0.2) | 0                    | (0.0) |                                       |             |
| <b>General Disorders And Administration Site Conditions</b> | 7                        | (1.5) | 5                    | (2.1) | -0.6                                  | (-3.4, 1.4) |
| Asthenia                                                    | 0                        | (0.0) | 2                    | (0.8) |                                       |             |
| Death                                                       | 1                        | (0.2) | 0                    | (0.0) |                                       |             |
| Malaise                                                     | 2                        | (0.4) | 0                    | (0.0) |                                       |             |
| Multi-Organ Failure                                         | 1                        | (0.2) | 0                    | (0.0) |                                       |             |
| Oedema Peripheral                                           | 1                        | (0.2) | 0                    | (0.0) |                                       |             |
| Pyrexia                                                     | 3                        | (0.6) | 4                    | (1.7) |                                       |             |
| <b>Hepatobiliary Disorders</b>                              | 3                        | (0.6) | 2                    | (0.8) | -0.2                                  | (-2.4, 1.2) |
| Cholangitis                                                 | 1                        | (0.2) | 0                    | (0.0) |                                       |             |
| Gallbladder Disorder                                        | 0                        | (0.0) | 1                    | (0.4) |                                       |             |
| Hepatitis                                                   | 1                        | (0.2) | 0                    | (0.0) |                                       |             |
| Hepatitis Toxic                                             | 0                        | (0.0) | 1                    | (0.4) |                                       |             |
| Portal Hypertension                                         | 1                        | (0.2) | 0                    | (0.0) |                                       |             |
| <b>Immune System Disorders</b>                              | 4                        | (0.9) | 0                    | (0.0) | 0.9                                   | (-0.7, 2.2) |
| Drug Hypersensitivity                                       | 1                        | (0.2) | 0                    | (0.0) |                                       |             |
| Hypersensitivity                                            | 2                        | (0.4) | 0                    | (0.0) |                                       |             |
| Immune Reconstitution Syndrome <sup>§</sup>                 | 2                        | (0.4) | 0                    | (0.0) |                                       |             |
| <b>Infections And Infestations</b>                          | 38                       | (8.2) | 20                   | (8.4) | -0.2                                  | (-5.0, 3.9) |
| AIDS Dementia Complex                                       | 0                        | (0.0) | 1                    | (0.4) |                                       |             |
| Abscess Bacterial                                           | 1                        | (0.2) | 0                    | (0.0) |                                       |             |
| Acinetobacter Bacteraemia                                   | 1                        | (0.2) | 0                    | (0.0) |                                       |             |
| Appendicitis                                                | 1                        | (0.2) | 1                    | (0.4) |                                       |             |
| Aspergillosis                                               | 1                        | (0.2) | 0                    | (0.0) |                                       |             |
| Atypical Mycobacterial Lymphadenitis                        | 0                        | (0.0) | 1                    | (0.4) |                                       |             |
| Bronchitis                                                  | 1                        | (0.2) | 0                    | (0.0) |                                       |             |
| Bronchopneumonia                                            | 2                        | (0.4) | 0                    | (0.0) |                                       |             |
| Cellulitis                                                  | 3                        | (0.6) | 0                    | (0.0) |                                       |             |
| Choriomeningitis Lymphocytic                                | 2                        | (0.4) | 0                    | (0.0) |                                       |             |
| Clostridium Difficile Colitis                               | 0                        | (0.0) | 1                    | (0.4) |                                       |             |
| Cryptosporidiosis Infection                                 | 0                        | (0.0) | 1                    | (0.4) |                                       |             |
| Cytomegalovirus Chorioretinitis                             | 0                        | (0.0) | 2                    | (0.8) |                                       |             |
| Cytomegalovirus Colitis                                     | 1                        | (0.2) | 1                    | (0.4) |                                       |             |
| Cytomegalovirus Hepatitis                                   | 1                        | (0.2) | 0                    | (0.0) |                                       |             |
| Cytomegalovirus Infection                                   | 1                        | (0.2) | 0                    | (0.0) |                                       |             |
| End Stage AIDS                                              | 0                        | (0.0) | 1                    | (0.4) |                                       |             |
| Endocarditis                                                | 0                        | (0.0) | 1                    | (0.4) |                                       |             |

|                                                       | Raltegravir<br>(N = 462) |              | Placebo<br>(N = 237) |              | Difference<br>[Raltegravir - Placebo] |                    |
|-------------------------------------------------------|--------------------------|--------------|----------------------|--------------|---------------------------------------|--------------------|
|                                                       | n                        | (%)          | n                    | (%)          | % Difference                          | (95% C.I.)         |
| Erythema Infectiosum                                  | 0                        | (0.0)        | 1                    | (0.4)        |                                       |                    |
| Gastroenteritis                                       | 0                        | (0.0)        | 1                    | (0.4)        |                                       |                    |
| Gastroenteritis Salmonella                            | 0                        | (0.0)        | 1                    | (0.4)        |                                       |                    |
| Genital Herpes                                        | 2                        | (0.4)        | 0                    | (0.0)        |                                       |                    |
| Giardiasis                                            | 0                        | (0.0)        | 1                    | (0.4)        |                                       |                    |
| HIV Infection                                         | 1                        | (0.2)        | 0                    | (0.0)        |                                       |                    |
| Herpes Zoster Disseminated                            | 1                        | (0.2)        | 0                    | (0.0)        |                                       |                    |
| Infection                                             | 1                        | (0.2)        | 0                    | (0.0)        |                                       |                    |
| Influenza                                             | 0                        | (0.0)        | 1                    | (0.2)        |                                       |                    |
| Meningitis Cryptococcal                               | 3                        | (0.6)        | 0                    | (0.0)        |                                       |                    |
| Mycobacterial Infection                               | 1                        | (0.2)        | 0                    | (0.0)        |                                       |                    |
| Mycobacterium Avium Complex                           | 0                        | (0.0)        | 2                    | (0.8)        |                                       |                    |
| Oesophageal Candidiasis                               | 1                        | (0.2)        | 3                    | (1.3)        |                                       |                    |
| Oral Candidiasis                                      | 0                        | (0.0)        | 1                    | (0.4)        |                                       |                    |
| Osteomyelitis                                         | 1                        | (0.2)        | 0                    | (0.0)        |                                       |                    |
| Otitis Media                                          | 1                        | (0.2)        | 0                    | (0.0)        |                                       |                    |
| Pneumonia                                             | 9                        | (1.9)        | 5                    | (2.1)        |                                       |                    |
| Pneumonia Pneumococcal                                | 1                        | (0.2)        | 0                    | (0.0)        |                                       |                    |
| Pseudomonal Sepsis                                    | 0                        | (0.0)        | 1                    | (0.4)        |                                       |                    |
| Pyelonephritis                                        | 1                        | (0.2)        | 0                    | (0.0)        |                                       |                    |
| Respiratory Tract Infection                           | 1                        | (0.2)        | 0                    | (0.0)        |                                       |                    |
| Retroviral Infection                                  | 1                        | (0.2)        | 0                    | (0.0)        |                                       |                    |
| Salmonella Bacteraemia                                | 0                        | (0.0)        | 1                    | (0.4)        |                                       |                    |
| Sepsis                                                | 0                        | (0.0)        | 1                    | (0.4)        |                                       |                    |
| Septic Shock                                          | 2                        | (0.4)        | 1                    | (0.4)        |                                       |                    |
| Sinusitis                                             | 2                        | (0.4)        | 0                    | (0.0)        |                                       |                    |
| Staphylococcal Bacteraemia                            | 1                        | (0.2)        | 0                    | (0.0)        |                                       |                    |
| Subcutaneous Abscess                                  | 1                        | (0.2)        | 0                    | (0.0)        |                                       |                    |
| Tuberculosis                                          | 1                        | (0.2)        | 0                    | (0.0)        |                                       |                    |
| Urosepsis                                             | 0                        | (0.0)        | 2                    | (0.8)        |                                       |                    |
| Viral Infection                                       | 1                        | (0.2)        | 0                    | (0.0)        |                                       |                    |
| <b>Injury, Poisoning And Procedural Complications</b> | <b>11</b>                | <b>(2.4)</b> | <b>4</b>             | <b>(1.7)</b> | <b>0.7</b>                            | <b>(-2.1, 2.8)</b> |
| Accidental Overdose                                   | 1                        | (0.2)        | 0                    | (0.0)        |                                       |                    |
| Foot Fracture                                         | 1                        | (0.2)        | 0                    | (0.0)        |                                       |                    |
| Hip Fracture                                          | 0                        | (0.0)        | 2                    | (0.8)        |                                       |                    |
| Humerus Fracture                                      | 1                        | (0.2)        | 0                    | (0.0)        |                                       |                    |
| Incisional Hernia                                     | 1                        | (0.2)        | 0                    | (0.0)        |                                       |                    |
| Intentional Overdose                                  | 1                        | (0.2)        | 1                    | (0.4)        |                                       |                    |
| Lower Limb Fracture                                   | 2                        | (0.4)        | 0                    | (0.0)        |                                       |                    |
| Overdose                                              | 1                        | (0.2)        | 0                    | (0.0)        |                                       |                    |
| Post Procedural Haematuria                            | 1                        | (0.2)        | 0                    | (0.0)        |                                       |                    |
| Post Procedural Haemorrhage                           | 1                        | (0.2)        | 0                    | (0.0)        |                                       |                    |
| Spinal Fracture                                       | 1                        | (0.2)        | 0                    | (0.0)        |                                       |                    |

|                                                                             | Raltegravir<br>(N = 462) |       | Placebo<br>(N = 237) |       | Difference<br>[Raltegravir - Placebo] |             |
|-----------------------------------------------------------------------------|--------------------------|-------|----------------------|-------|---------------------------------------|-------------|
|                                                                             | n                        | (%)   | n                    | (%)   | % Difference                          | (95% C.I.)  |
| Thoracic Vertebral Fracture                                                 | 0                        | (0.0) | 1                    | (0.4) |                                       |             |
| <b>Investigations</b>                                                       | 1                        | (0.2) | 0                    | (0.0) | 0.2                                   | (-1.4, 1.2) |
| Weight Decreased                                                            | 1                        | (0.2) | 0                    | (0.0) |                                       |             |
| <b>Metabolism And Nutrition Disorders</b>                                   | 5                        | (1.1) | 4                    | (1.7) | -0.6                                  | (-3.3, 1.2) |
| Cachexia                                                                    | 1                        | (0.2) | 0                    | (0.0) |                                       |             |
| Dehydration                                                                 | 3                        | (0.6) | 1                    | (0.4) |                                       |             |
| Diabetes Mellitus                                                           | 1                        | (0.2) | 0                    | (0.0) |                                       |             |
| Failure To Thrive                                                           | 0                        | (0.0) | 1                    | (0.4) |                                       |             |
| Hyperglycaemia                                                              | 0                        | (0.0) | 1                    | (0.4) |                                       |             |
| Hypovolaemia                                                                | 0                        | (0.0) | 1                    | (0.4) |                                       |             |
| Malnutrition                                                                | 0                        | (0.0) | 1                    | (0.4) |                                       |             |
| Obesity                                                                     | 0                        | (0.0) | 1                    | (0.4) |                                       |             |
| <b>Musculoskeletal And Connective Tissue Disorders</b>                      | 4                        | (0.9) | 2                    | (0.8) | 0.0                                   | (-2.2, 1.5) |
| Bone Pain                                                                   | 1                        | (0.2) | 0                    | (0.0) |                                       |             |
| Intervertebral Disc Protrusion                                              | 0                        | (0.0) | 1                    | (0.4) |                                       |             |
| Musculoskeletal Pain                                                        | 1                        | (0.2) | 0                    | (0.0) |                                       |             |
| Osteonecrosis                                                               | 2                        | (0.4) | 0                    | (0.0) |                                       |             |
| Osteoporotic Fracture                                                       | 0                        | (0.0) | 1                    | (0.4) |                                       |             |
| <b>Neoplasms Benign, Malignant And Unspecified (Including Cysts/Polyps)</b> | 16                       | (3.5) | 4                    | (1.7) | 1.8                                   | (-1.1, 4.2) |
| Anal Cancer                                                                 | 1                        | (0.2) | 1                    | (0.4) |                                       |             |
| Anal Cancer Stage 0                                                         | 1                        | (0.2) | 0                    | (0.0) |                                       |             |
| B-Cell Lymphoma                                                             | 1                        | (0.2) | 0                    | (0.0) |                                       |             |
| Basal Cell Carcinoma                                                        | 1                        | (0.2) | 1                    | (0.4) |                                       |             |
| Bowen's Disease                                                             | 1                        | (0.2) | 0                    | (0.0) |                                       |             |
| Hepatic Neoplasm Malignant                                                  | 1                        | (0.2) | 0                    | (0.0) |                                       |             |
| Kaposi's Sarcoma AIDS Related                                               | 2                        | (0.4) | 0                    | (0.0) |                                       |             |
| Lymphoma                                                                    | 1                        | (0.2) | 1                    | (0.4) |                                       |             |
| Metastatic Squamous Cell Carcinoma                                          | 1                        | (0.2) | 0                    | (0.0) |                                       |             |
| Rectal Cancer                                                               | 1                        | (0.2) | 0                    | (0.0) |                                       |             |
| Rectal Cancer Stage 0                                                       | 1                        | (0.2) | 0                    | (0.0) |                                       |             |
| Squamous Cell Carcinoma                                                     | 4                        | (0.9) | 1                    | (0.4) |                                       |             |
| T-Cell Lymphoma                                                             | 1                        | (0.2) | 0                    | (0.0) |                                       |             |
| <b>Nervous System Disorders</b>                                             | 6                        | (1.3) | 5                    | (2.1) | -0.8                                  | (-3.6, 1.1) |
| Cerebral Infarction                                                         | 0                        | (0.0) | 1                    | (0.4) |                                       |             |
| Convulsion                                                                  | 1                        | (0.2) | 1                    | (0.4) |                                       |             |
| Encephalitis                                                                | 1                        | (0.2) | 0                    | (0.0) |                                       |             |
| Epilepsy                                                                    | 0                        | (0.0) | 1                    | (0.4) |                                       |             |
| Migraine                                                                    | 1                        | (0.2) | 1                    | (0.4) |                                       |             |
| Neuralgia                                                                   | 1                        | (0.2) | 0                    | (0.0) |                                       |             |
| Poor Quality Sleep                                                          | 0                        | (0.0) | 1                    | (0.4) |                                       |             |
| Presyncope                                                                  | 1                        | (0.2) | 0                    | (0.0) |                                       |             |
| Psychomotor Hyperactivity                                                   | 0                        | (0.0) | 1                    | (0.4) |                                       |             |
| Syncope                                                                     | 1                        | (0.2) | 0                    | (0.0) |                                       |             |

|                                                        | <b>Raltegravir</b><br>(N = 462) |            | <b>Placebo</b><br>(N = 237) |            | <b>Difference</b><br>[Raltegravir - Placebo] |                   |
|--------------------------------------------------------|---------------------------------|------------|-----------------------------|------------|----------------------------------------------|-------------------|
|                                                        | <b>n</b>                        | <b>(%)</b> | <b>n</b>                    | <b>(%)</b> | <b>% Difference</b>                          | <b>(95% C.I.)</b> |
| <b>Psychiatric Disorders</b>                           | 3                               | (0.6)      | 3                           | (1.3)      | -0.6                                         | (-3.1, 0.9)       |
| Depression                                             | 2                               | (0.4)      | 2                           | (0.8)      |                                              |                   |
| Mental Status Changes                                  | 1                               | (0.2)      | 1                           | (0.4)      |                                              |                   |
| Panic Attack                                           | 0                               | (0.0)      | 1                           | (0.4)      |                                              |                   |
| <b>Renal And Urinary Disorders</b>                     | 6                               | (1.3)      | 4                           | (1.7)      | -0.4                                         | (-3.1, 1.4)       |
| Focal Glomerulosclerosis                               | 1                               | (0.2)      | 0                           | (0.0)      |                                              |                   |
| Nephrolithiasis                                        | 1                               | (0.2)      | 1                           | (0.4)      |                                              |                   |
| Nephropathy                                            | 0                               | (0.0)      | 1                           | (0.4)      |                                              |                   |
| Nephropathy Toxic                                      | 1                               | (0.2)      | 0                           | (0.0)      |                                              |                   |
| Nephrotic Syndrome                                     | 1                               | (0.2)      | 0                           | (0.0)      |                                              |                   |
| Proteinuria                                            | 1                               | (0.2)      | 0                           | (0.0)      |                                              |                   |
| Renal Failure                                          | 1                               | (0.2)      | 1                           | (0.4)      |                                              |                   |
| Renal Failure Acute                                    | 0                               | (0.0)      | 1                           | (0.4)      |                                              |                   |
| Renal Failure Chronic                                  | 1                               | (0.2)      | 0                           | (0.0)      |                                              |                   |
| Renal Tubular Necrosis                                 | 1                               | (0.2)      | 0                           | (0.0)      |                                              |                   |
| <b>Reproductive System And Breast Disorders</b>        | 3                               | (0.6)      | 2                           | (0.8)      | -0.2                                         | (-2.4, 1.2)       |
| Benign Prostatic Hyperplasia                           | 1                               | (0.2)      | 0                           | (0.0)      |                                              |                   |
| Gynaecomastia                                          | 0                               | (0.0)      | 1                           | (0.4)      |                                              |                   |
| Oedema Genital                                         | 0                               | (0.0)      | 1                           | (0.4)      |                                              |                   |
| Prostatitis                                            | 2                               | (0.4)      | 0                           | (0.0)      |                                              |                   |
| <b>Respiratory, Thoracic And Mediastinal Disorders</b> | 4                               | (0.9)      | 2                           | (0.8)      | 0.0                                          | (-2.2, 1.5)       |
| Asthma                                                 | 2                               | (0.4)      | 0                           | (0.0)      |                                              |                   |
| Pulmonary Hypertension                                 | 0                               | (0.0)      | 1                           | (0.4)      |                                              |                   |
| Respiratory Distress                                   | 1                               | (0.2)      | 0                           | (0.0)      |                                              |                   |
| Respiratory Failure                                    | 1                               | (0.2)      | 1                           | (0.4)      |                                              |                   |
| <b>Vascular Disorders</b>                              | 2                               | (0.4)      | 3                           | (1.3)      | -0.8                                         | (-3.3, 0.5)       |
| Deep Vein Thrombosis                                   | 1                               | (0.2)      | 0                           | (0.0)      |                                              |                   |
| Hypotension                                            | 0                               | (0.0)      | 1                           | (0.4)      |                                              |                   |
| Shock                                                  | 1                               | (0.2)      | 0                           | (0.0)      |                                              |                   |
| Varicophlebitis                                        | 0                               | (0.0)      | 1                           | (0.4)      |                                              |                   |
| Venous Thrombosis                                      | 0                               | (0.0)      | 1                           | (0.4)      |                                              |                   |

Adverse event terms are from the Medical Dictionary for Regulatory Activities (MedDRA version 10.1).

Frequencies of adverse events were not adjusted for duration of follow-up. A patient is counted only once within a given organ system category, but may be tabulated more than once in different subcategories; a patient may also appear in more than one organ system category.

N = Number of patients in each treatment group.

n (%) = number (percent) of patients in each subcategory.

§ Indicates that the investigator reported immune reconstitution syndrome as an adverse event. Information regarding possible immune reconstitution syndrome was not actively solicited. Not all reports of immune reconstitution syndrome were recorded as adverse events.

**Table A3. Proportion Of Patients With Specific Clinical Adverse Events Of Any Intensity Or Causality During The Double-Blind Phases Of The Combined BENCHMRK Studies With An Incidence  $\geq 2\%$  In Either Treatment Group**

|                                                             | Raltegravir Group<br>(N = 462) |             | Placebo Group<br>(N = 237) |             | Difference<br>[Raltegravir - Placebo] |              |
|-------------------------------------------------------------|--------------------------------|-------------|----------------------------|-------------|---------------------------------------|--------------|
| Weeks of follow-up, median (range)                          | 57.4                           | (3.0, 72.0) | 37.6                       | (5.6, 72.9) |                                       |              |
|                                                             | n                              | (%)         | n                          | (%)         | % Difference (95% C.I.)               |              |
| <b>Patients With One Or More Adverse Events</b>             | 417                            | (90.3)      | 209                        | (88.2)      | 2.1                                   | (-2.6, 7.4)  |
| <b>Blood And Lymphatic System Disorders</b>                 | 39                             | (8.4)       | 21                         | (8.9)       | -0.4                                  | (-5.3, 3.8)  |
| Anaemia                                                     | 14                             | (3.0)       | 9                          | (3.8)       |                                       |              |
| Lymphadenopathy                                             | 17                             | (3.7)       | 7                          | (3.0)       |                                       |              |
| Neutropenia                                                 | 6                              | (1.3)       | 5                          | (2.1)       |                                       |              |
| <b>Cardiac Disorders</b>                                    | 17                             | (3.7)       | 9                          | (3.8)       | -0.1                                  | (-3.7, 2.7)  |
| <b>Ear And Labyrinth Disorders</b>                          | 13                             | (2.8)       | 5                          | (2.1)       | 0.7                                   | (-2.2, 3.0)  |
| <b>Eye Disorders</b>                                        | 24                             | (5.2)       | 15                         | (6.3)       | -1.1                                  | (-5.3, 2.3)  |
| Conjunctivitis                                              | 10                             | (2.2)       | 1                          | (0.4)       |                                       |              |
| <b>Gastrointestinal Disorders</b>                           | 204                            | (44.2)      | 110                        | (46.4)      | -2.3                                  | (-10.1, 5.5) |
| Abdominal Distension                                        | 13                             | (2.8)       | 7                          | (3.0)       |                                       |              |
| Abdominal Pain                                              | 27                             | (5.8)       | 10                         | (4.2)       |                                       |              |
| Abdominal Pain Upper                                        | 13                             | (2.8)       | 10                         | (4.2)       |                                       |              |
| Constipation                                                | 14                             | (3.0)       | 1                          | (0.4)       |                                       |              |
| Diarrhoea                                                   | 85                             | (18.4)      | 50                         | (21.1)      |                                       |              |
| Flatulence                                                  | 16                             | (3.5)       | 7                          | (3.0)       |                                       |              |
| Nausea                                                      | 53                             | (11.5)      | 34                         | (14.3)      |                                       |              |
| Vomiting                                                    | 34                             | (7.4)       | 22                         | (9.3)       |                                       |              |
| <b>General Disorders And Administration Site Conditions</b> | 168                            | (36.4)      | 85                         | (35.9)      | 0.5                                   | (-7.1, 7.9)  |
| Asthenia                                                    | 15                             | (3.2)       | 9                          | (3.8)       |                                       |              |
| Fatigue                                                     | 43                             | (9.3)       | 11                         | (4.6)       |                                       |              |
| Injection Site Pain                                         | 10                             | (2.2)       | 3                          | (1.3)       |                                       |              |
| Injection Site Reaction                                     | 46                             | (10.0)      | 23                         | (9.7)       |                                       |              |
| Oedema Peripheral                                           | 9                              | (1.9)       | 7                          | (3.0)       |                                       |              |
| Pyrexia                                                     | 31                             | (6.7)       | 30                         | (12.7)      |                                       |              |
| <b>Hepatobiliary Disorders</b>                              | 13                             | (2.8)       | 8                          | (3.4)       | -0.6                                  | (-3.9, 2.0)  |
| <b>Immune System Disorders</b>                              | 14                             | (3.0)       | 5                          | (2.1)       | 0.9                                   | (-2.1, 3.3)  |
| <b>Infections And Infestations</b>                          | 269                            | (58.2)      | 132                        | (55.7)      | 2.5                                   | (-5.2, 10.3) |
| Anogenital Warts                                            | 11                             | (2.4)       | 2                          | (0.8)       |                                       |              |
| Bronchitis                                                  | 34                             | (7.4)       | 11                         | (4.6)       |                                       |              |
| Cellulitis                                                  | 11                             | (2.4)       | 4                          | (1.7)       |                                       |              |
| Folliculitis                                                | 12                             | (2.6)       | 2                          | (0.8)       |                                       |              |
| Gastroenteritis                                             | 15                             | (3.2)       | 5                          | (2.1)       |                                       |              |
| Genital Herpes                                              | 10                             | (2.2)       | 6                          | (2.5)       |                                       |              |
| Herpes Simplex                                              | 10                             | (2.2)       | 3                          | (1.3)       |                                       |              |
| Herpes Zoster                                               | 28                             | (6.1)       | 3                          | (1.3)       |                                       |              |

|                                                                                 | Raltegravir Group |        | Placebo Group |        | Difference              |              |
|---------------------------------------------------------------------------------|-------------------|--------|---------------|--------|-------------------------|--------------|
|                                                                                 | (N = 462)         |        | (N = 237)     |        | [Raltegravir - Placebo] |              |
|                                                                                 | n                 | (%)    | n             | (%)    | % Difference (95% C.I.) |              |
| Influenza                                                                       | 23                | ( 5.0) | 9             | ( 3.8) |                         |              |
| Nasopharyngitis                                                                 | 37                | ( 8.0) | 14            | ( 5.9) |                         |              |
| Oesophageal Candidiasis                                                         | 3                 | ( 0.6) | 6             | ( 2.5) |                         |              |
| Oral Candidiasis                                                                | 7                 | ( 1.5) | 19            | ( 8.0) |                         |              |
| Pneumonia                                                                       | 16                | ( 3.5) | 9             | ( 3.8) |                         |              |
| Respiratory Tract Infection                                                     | 12                | ( 2.6) | 1             | ( 0.4) |                         |              |
| Sinusitis                                                                       | 18                | ( 3.9) | 8             | ( 3.4) |                         |              |
| Tooth Infection                                                                 | 2                 | ( 0.4) | 5             | ( 2.1) |                         |              |
| Upper Respiratory Tract Infection                                               | 37                | ( 8.0) | 17            | ( 7.2) |                         |              |
| Urinary Tract Infection                                                         | 7                 | ( 1.5) | 8             | ( 3.4) |                         |              |
| <b>Injury, Poisoning And Procedural Complications</b>                           | 50                | (10.8) | 22            | ( 9.3) | 1.5                     | (-3.5, 6.0)  |
| <b>Investigations</b>                                                           | 23                | ( 5.0) | 17            | ( 7.2) | -2.2                    | (-6.6, 1.4)  |
| Weight Decreased                                                                | 10                | ( 2.2) | 7             | ( 3.0) |                         |              |
| <b>Metabolism And Nutrition Disorders</b>                                       | 52                | (11.3) | 26            | (11.0) | 0.3                     | (-5.0, 5.0)  |
| Anorexia                                                                        | 10                | ( 2.2) | 6             | ( 2.5) |                         |              |
| <b>Musculoskeletal And Connective Tissue Disorders</b>                          | 94                | (20.3) | 37            | (15.6) | 4.7                     | (-1.5, 10.4) |
| Arthralgia                                                                      | 18                | ( 3.9) | 7             | ( 3.0) |                         |              |
| Back Pain                                                                       | 17                | ( 3.7) | 8             | ( 3.4) |                         |              |
| Muscle Spasms                                                                   | 8                 | ( 1.7) | 6             | ( 2.5) |                         |              |
| Myalgia                                                                         | 10                | ( 2.2) | 7             | ( 3.0) |                         |              |
| Pain In Extremity                                                               | 20                | ( 4.3) | 7             | ( 3.0) |                         |              |
| <b>Neoplasms Benign, Malignant And Unspecified (Including Cysts And Polyps)</b> | 41                | ( 8.9) | 13            | ( 5.5) | 3.4                     | (-0.9, 7.2)  |
| Skin Papilloma                                                                  | 18                | ( 3.9) | 8             | ( 3.4) |                         |              |
| <b>Nervous System Disorders</b>                                                 | 120               | (26.0) | 59            | (24.9) | 1.1                     | (-5.9, 7.7)  |
| Dizziness                                                                       | 21                | ( 4.5) | 6             | ( 2.5) |                         |              |
| Headache                                                                        | 47                | (10.2) | 30            | (12.7) |                         |              |
| Paraesthesia                                                                    | 6                 | ( 1.3) | 5             | ( 2.1) |                         |              |
| <b>Psychiatric Disorders</b>                                                    | 62                | (13.4) | 34            | (14.3) | -0.9                    | (-6.7, 4.3)  |
| Anxiety                                                                         | 10                | ( 2.2) | 6             | ( 2.5) |                         |              |
| Depression                                                                      | 13                | ( 2.8) | 9             | ( 3.8) |                         |              |
| Insomnia                                                                        | 22                | ( 4.8) | 11            | ( 4.6) |                         |              |
| <b>Renal And Urinary Disorders</b>                                              | 31                | ( 6.7) | 14            | ( 5.9) | 0.8                     | (-3.4, 4.4)  |
| <b>Reproductive System And Breast Disorders</b>                                 | 31                | ( 6.7) | 9             | ( 3.8) | 2.9                     | (-0.8, 6.2)  |
| <b>Respiratory, Thoracic And Mediastinal Disorders</b>                          | 69                | (14.9) | 37            | (15.6) | -0.7                    | (-6.6, 4.8)  |
| Cough                                                                           | 25                | ( 5.4) | 8             | ( 3.4) |                         |              |
| Pharyngolaryngeal Pain                                                          | 11                | ( 2.4) | 9             | ( 3.8) |                         |              |
| Sinus Congestion                                                                | 3                 | ( 0.6) | 5             | ( 2.1) |                         |              |
| <b>Skin And Subcutaneous Tissue Disorders</b>                                   | 134               | (29.0) | 53            | (22.4) | 6.6                     | (-0.3, 13.2) |
| Eczema                                                                          | 4                 | ( 0.9) | 7             | ( 3.0) |                         |              |
| Night Sweats                                                                    | 13                | ( 2.8) | 5             | ( 2.1) |                         |              |

|                           | Raltegravir Group |        | Placebo Group |        | Difference              |             |
|---------------------------|-------------------|--------|---------------|--------|-------------------------|-------------|
|                           | (N = 462)         |        | (N = 237)     |        | [Raltegravir - Placebo] |             |
|                           | n                 | (%)    | n             | (%)    | % Difference (95% C.I.) |             |
| Pruritus                  | 14                | ( 3.0) | 5             | ( 2.1) |                         |             |
| Rash                      | 29                | ( 6.3) | 6             | ( 2.5) |                         |             |
| <b>Vascular Disorders</b> | 27                | ( 5.8) | 13            | ( 5.5) | 0.4                     | (-3.7, 3.8) |
| Hypertension              | 15                | ( 3.2) | 5             | (2.1)  |                         |             |

Adverse event terms are from the Medical Dictionary for Regulatory Activities (MedDRA version 10.1). Frequencies of adverse events were not adjusted for duration of follow-up. A patient is counted only once within a given organ system category, but may be tabulated more than once in different subcategories; a patient may also appear in more than one organ system category.

N = Number of patients in each treatment group.

n (%) = number (percent) of patients in each subcategory.

**Table A4. Proportion Of Patients With Laboratory Abnormalities Exceeding Predefined Limits Of Change (PDLC) During The Double-Blind Phases Of The Combined BENCHMRK Studies**

| Laboratory Test (Unit)                              | PDLC Criteria | Grade    | Raltegravir<br>(N=462)<br>n/m (%) | Placebo<br>(N=237)<br>n/m (%) | Difference<br>[Raltegravir - Placebo]<br>% Difference (95% C.I.) |
|-----------------------------------------------------|---------------|----------|-----------------------------------|-------------------------------|------------------------------------------------------------------|
| <b>hematology laboratory tests</b>                  |               |          |                                   |                               |                                                                  |
| absolute neutrophil count (10 <sup>3</sup> /microL) | 0.75 - 0.999  | Grade 2  | 17/462 (3.7)                      | 18/237 (7.6)                  | -4.0 (-9.2, 0.5)                                                 |
|                                                     | 0.50 - 0.749  | Grade 3  | 14/462 (3.0)                      | 8/237 (3.4)                   |                                                                  |
|                                                     | <0.50         | Grade 4  | 5/462 (1.1)                       | 2/237 (0.8)                   |                                                                  |
|                                                     | <1.00         | Gr 2 - 4 | 36/462 (7.8)                      | 28/237 (11.8)                 |                                                                  |
| hemoglobin (gm/dL)                                  | 7.5 - 8.4     | Grade 2  | 5/462 (1.1)                       | 6/237 (2.5)                   | -0.8 (-4.0, 1.6)                                                 |
|                                                     | 6.5 - 7.4     | Grade 3  | 4/462 (0.9)                       | 1/237 (0.4)                   |                                                                  |
|                                                     | < 6.5         | Grade 4  | 1/462 (0.2)                       | 0/237 (0.0)                   |                                                                  |
|                                                     | < 8.5         | Gr 2 - 4 | 10/462 (2.2)                      | 7/237 (3.0)                   |                                                                  |
| platelet count (10 <sup>3</sup> /microL)            | 50 - 99.999   | Grade 2  | 19/462 (4.1)                      | 15/237 (6.3)                  | -1.5 (-5.9, 2.1)                                                 |
|                                                     | 25 - 49.999   | Grade 3  | 3/462 (0.6)                       | 1/237 (0.4)                   |                                                                  |
|                                                     | <25           | Grade 4  | 4/462 (0.9)                       | 1/237 (0.4)                   |                                                                  |
|                                                     | <100          | Gr 2 - 4 | 26/462 (5.6)                      | 17/237 (7.2)                  |                                                                  |
| <b>blood chemistry tests</b>                        |               |          |                                   |                               |                                                                  |
| fasting(non-random) serum LDL-C (mg/dL)             | 160 - 189     | Grade 2  | 46/436 (10.6)                     | 12/218 (5.5)                  | 6.2 (0.6, 11.2)                                                  |
|                                                     | ≥190          | Grade 3  | 23/436 (5.3)                      | 9/218 (4.1)                   |                                                                  |
|                                                     | ≥160          | Gr 2 - 3 | 69/436 (15.8)                     | 21/218 (9.6)                  |                                                                  |
| fasting(non-random) serum cholesterol (mg/dL)       | 240 - 300     | Grade 2  | 85/462 (18.4)                     | 34/237 (14.3)                 | 7.4 (0.8, 13.6)                                                  |
|                                                     | >300          | Grade 3  | 37/462 (8.0)                      | 11/237 (4.6)                  |                                                                  |
|                                                     | ≥ 240         | Gr 2 - 3 | 122/462 (26.4)                    | 45/237 (19.0)                 |                                                                  |

| Laboratory Test (Unit)                         | PDLC Criteria                       | Grade    | Raltegravir<br>(N=462)<br>n/m (%) | Placebo<br>(N=237)<br>n/m (%) | Difference<br>[Raltegravir - Placebo]<br>% Difference (95% C.I.) |
|------------------------------------------------|-------------------------------------|----------|-----------------------------------|-------------------------------|------------------------------------------------------------------|
| fasting(non-random) serum triglyceride (mg/dL) | 500 - 750                           | Grade 2  | 28/462 (6.1)                      | 25/237 (10.5)                 | -1.1 (-7.1, 4.3)                                                 |
|                                                | 751 - 1200                          | Grade 3  | 24/462 (5.2)                      | 7/237 (3.0)                   |                                                                  |
|                                                | >1200                               | Grade 4  | 15/462 (3.2)                      | 5/237 (2.1)                   |                                                                  |
|                                                | > 500                               | Gr 2 - 4 | 67/462 (14.5)                     | 37/237 (15.6)                 |                                                                  |
| fasting(non-random) serum glucose test (mg/dL) | 126 - 250                           | Grade 2  | 47/462 (10.2)                     | 17/237 (7.2)                  | 3.0 (-2.0, 7.5)                                                  |
|                                                | 251 - 500                           | Grade 3  | 8/462 (1.7)                       | 4/237 (1.7)                   |                                                                  |
|                                                | >500                                | Grade 4  | 0/462 (0.0)                       | 0/237 (0.0)                   |                                                                  |
|                                                | >125                                | Gr 2 - 4 | 55/462 (11.9)                     | 21/237 (8.9)                  |                                                                  |
| total serum bilirubin (mg/dL)                  | 1.6 - 2.5 x ULN                     | Grade 2  | 26/462 (5.6)                      | 10/237 (4.2)                  | 2.6 (-2.0, 6.6)                                                  |
|                                                | 2.6 - 5.0 x ULN                     | Grade 3  | 13/462 (2.8)                      | 6/237 (2.5)                   |                                                                  |
|                                                | >5.0 x ULN                          | Grade 4  | 4/462 (0.9)                       | 0/237 (0.0)                   |                                                                  |
|                                                | >1.5 x ULN                          | Gr 2 - 4 | 43/462 (9.3)                      | 16/237 (6.8)                  |                                                                  |
|                                                | >2.5 - 5.0 x Baseline <sup>‡</sup>  |          | 19/462 (4.1)                      | 9/237 (3.8)                   |                                                                  |
|                                                | >5.0 -10.0 x Baseline <sup>‡</sup>  |          | 16/462 (3.5)                      | 7/237 (3.0)                   |                                                                  |
|                                                | >10.0 x Baseline <sup>‡</sup>       |          | 10/462 (2.2)                      | 0/237 (0.0)                   |                                                                  |
| serum direct bilirubin (mg/dL)                 | >2.5 - 5.0 x Baseline <sup>‡</sup>  |          | 10/462 (2.2)                      | 4/237 (1.7)                   |                                                                  |
|                                                | >5.0 - 10.0 x Baseline <sup>‡</sup> |          | 1/462 (0.2)                       | 4/237 (1.7)                   |                                                                  |
|                                                | >10.0 x Baseline <sup>‡</sup>       |          | 5/462 (1.1)                       | 0/237 (0.0)                   |                                                                  |
| serum indirect bilirubin (mg/dL)               | >2.5 - 5.0 x Baseline <sup>‡</sup>  |          | 6/462 (1.3)                       | 1/237 (0.4)                   |                                                                  |
|                                                | >5.0 - 10.0 x Baseline <sup>‡</sup> |          | 15/462 (3.2)                      | 6/237 (2.5)                   |                                                                  |
|                                                | >10.0 x Baseline <sup>‡</sup>       |          | 12/462 (2.6)                      | 2/237 (0.8)                   |                                                                  |
| serum creatinine (mg/dL)                       | 1.4 - 1.8 x ULN                     | Grade 2  | 17/462 (3.7)                      | 7/237 (3.0)                   | 0.8 (-3.0, 3.9)                                                  |
|                                                | 1.9 - 3.4 x ULN                     | Grade 3  | 5/462 (1.1)                       | 3/237 (1.3)                   |                                                                  |
|                                                | ≥3.5 x ULN                          | Grade 4  | 1/462 (0.2)                       | 0/237 (0.0)                   |                                                                  |
|                                                | ≥1.4 x ULN                          | Gr 2 - 4 | 23/462 (5.0)                      | 10/237 (4.2)                  |                                                                  |
|                                                | >2.5 x Baseline <sup>‡</sup>        |          | 3/462 (0.6)                       | 0/237 (0.0)                   |                                                                  |

| Laboratory Test (Unit)                            | PDLC Criteria                      | Grade    | Raltegravir<br>(N=462)<br>n/m (%) | Placebo<br>(N=237)<br>n/m (%) | Difference<br>[Raltegravir - Placebo]<br>% Difference (95% C.I.) |
|---------------------------------------------------|------------------------------------|----------|-----------------------------------|-------------------------------|------------------------------------------------------------------|
| serum aspartate aminotransferase (IU/L)           | 2.6 - 5.0 x ULN                    | Grade 2  | 44/462 (9.5)                      | 17/237 (7.2)                  | 1.6 (-3.8, 6.5)                                                  |
|                                                   | 5.1 - 10.0 x ULN                   | Grade 3  | 14/462 (3.0)                      | 7/237 (3.0)                   |                                                                  |
|                                                   | >10.0 x ULN                        | Grade 4  | 2/462 (0.4)                       | 3/237 (1.3)                   |                                                                  |
|                                                   | >2.5 x ULN                         | Gr 2 - 4 | 60/462 (13.0)                     | 27/237 (11.4)                 |                                                                  |
|                                                   | >2.5 - 5.0 x Baseline <sup>‡</sup> |          | 30/462 (6.5)                      | 12/237 (5.1)                  |                                                                  |
|                                                   | >5.0 x Baseline <sup>‡</sup>       |          | 14/462 (3.0)                      | 12/237 (5.1)                  |                                                                  |
| serum alanine aminotransferase (IU/L)             | 2.6 - 5.0 x ULN                    | Grade 2  | 36/462 (7.8)                      | 20/237 (8.4)                  | 0.3 (-5.1, 5.2)                                                  |
|                                                   | 5.1 - 10.0 x ULN                   | Grade 3  | 16/462 (3.5)                      | 4/237 (1.7)                   |                                                                  |
|                                                   | >10.0 x ULN                        | Grade 4  | 4/462 (0.9)                       | 4/237 (1.7)                   |                                                                  |
|                                                   | >2.5 x ULN                         | Gr 2 - 4 | 56/462 (12.1)                     | 28/237 (11.8)                 |                                                                  |
|                                                   | >2.5 - 5.0 x Baseline <sup>‡</sup> |          | 39/462 (8.4)                      | 23/237 (9.7)                  |                                                                  |
|                                                   | >5.0 x Baseline <sup>‡</sup>       |          | 20/462 (4.3)                      | 8/237 (3.4)                   |                                                                  |
| serum alkaline phosphatase (IU/L)                 | 2.6 - 5.0 x ULN                    | Grade 2  | 11/462 (2.4)                      | 1/237 (0.4)                   | 1.4 (-1.7, 3.8)                                                  |
|                                                   | 5.1 - 10.0 x ULN                   | Grade 3  | 2/462 (0.4)                       | 3/237 (1.3)                   |                                                                  |
|                                                   | >10.0 x ULN                        | Grade 4  | 3/462 (0.6)                       | 1/237 (0.4)                   |                                                                  |
|                                                   | >2.5 x ULN                         | Gr 2 - 4 | 16/462 (3.5)                      | 5/237 (2.1)                   |                                                                  |
|                                                   | >2.5 - 5.0 x Baseline <sup>‡</sup> |          | 8/462 (1.7)                       | 2/237 (0.8)                   |                                                                  |
|                                                   | >5.0 x Baseline <sup>‡</sup>       |          | 2/462 (0.4)                       | 1/237 (0.4)                   |                                                                  |
| serum pancreatic amylase test (IU/L) <sup>§</sup> | 1.6 - 2.0 x ULN                    | Grade 2  | 8/462 (1.7)                       | 3/237 (1.3)                   | 2.3 (-1.4, 5.5)                                                  |
|                                                   | 2.1 - 5.0 x ULN                    | Grade 3  | 19/462 (4.1)                      | 6/237 (2.5)                   |                                                                  |
|                                                   | >5.0 x ULN                         | Grade 4  | 1/462 (0.2)                       | 0/237 (0.0)                   |                                                                  |
|                                                   | >1.5 x ULN                         | Gr 2 - 4 | 28/462 (6.1)                      | 9/237 (3.8)                   |                                                                  |
| serum lipase test (IU/L)                          | 1.6 - 3.0 x ULN                    | Grade 2  | 18/462 (3.9)                      | 6/237 (2.5)                   | 1.6 (-1.9, 4.6)                                                  |
|                                                   | 3.1 - 5.0 x ULN                    | Grade 3  | 5/462 (1.1)                       | 2/237 (0.8)                   |                                                                  |
|                                                   | >5.0 x ULN                         | Grade 4  | 0/462 (0.0)                       | 0/237 (0.0)                   |                                                                  |
|                                                   | >1.5 x ULN                         | Gr 2 - 4 | 23/462 (5.0)                      | 8/237 (3.4)                   |                                                                  |

| Laboratory Test (Unit)                                                                                                                                                                                                                                                                                                                                                                                                                                                                                                                                                                                                                                                                                                                                                                                                                                                                                                                                                                  | PDLC Criteria     | Grade    | Raltegravir<br>(N=462)<br>n/m (%) | Placebo<br>(N=237)<br>n/m (%) | Difference<br>[Raltegravir - Placebo]<br>% Difference (95% C.I.) |
|-----------------------------------------------------------------------------------------------------------------------------------------------------------------------------------------------------------------------------------------------------------------------------------------------------------------------------------------------------------------------------------------------------------------------------------------------------------------------------------------------------------------------------------------------------------------------------------------------------------------------------------------------------------------------------------------------------------------------------------------------------------------------------------------------------------------------------------------------------------------------------------------------------------------------------------------------------------------------------------------|-------------------|----------|-----------------------------------|-------------------------------|------------------------------------------------------------------|
| serum creatine kinase (IU/L)                                                                                                                                                                                                                                                                                                                                                                                                                                                                                                                                                                                                                                                                                                                                                                                                                                                                                                                                                            | 6.0 - 9.9 x ULN   | Grade 2  | 11/462 (2.4)                      | 4/237 (1.7)                   | 2.7 (-1.4, 6.3)                                                  |
|                                                                                                                                                                                                                                                                                                                                                                                                                                                                                                                                                                                                                                                                                                                                                                                                                                                                                                                                                                                         | 10.0 - 19.9 x ULN | Grade 3  | 15/462 (3.2)                      | 6/237 (2.5)                   |                                                                  |
|                                                                                                                                                                                                                                                                                                                                                                                                                                                                                                                                                                                                                                                                                                                                                                                                                                                                                                                                                                                         | ≥20.0 x ULN       | Grade 4  | 10/462 (2.2)                      | 2/237 (0.8)                   |                                                                  |
|                                                                                                                                                                                                                                                                                                                                                                                                                                                                                                                                                                                                                                                                                                                                                                                                                                                                                                                                                                                         | >6.0 x ULN        | Gr 2 - 4 | 36/462 (7.8)                      | 12/237 (5.1)                  |                                                                  |
| <p>† For inclusion in this analysis, both a baseline and at least one on-treatment laboratory value had to be present. A patient was included as a Grade X event if his/her highest grade during treatment was X and the laboratory value was worse than baseline.</p> <p>‡ A patient was included in the event of '&gt;X-fold Baseline' if his/her highest laboratory value during treatment fell in this category and was more extreme than the upper limit of normal.</p> <p>§ Defined as (the number of patients meeting the specific serum pancreatic amylase criteria) / (the number of patients with serum amylase test result).</p> <p>N = total number of patients randomized in the treatment group.</p> <p>n/m = number of patients with PDLC/number of patients with laboratory test. For the criteria using baseline, m=number of patients with baseline values for that laboratory test.</p> <p>LLN = Lower limit of normal range. ULN = Upper limit of normal range.</p> |                   |          |                                   |                               |                                                                  |

Supplemental Figure 1A. BENCHMRK-1

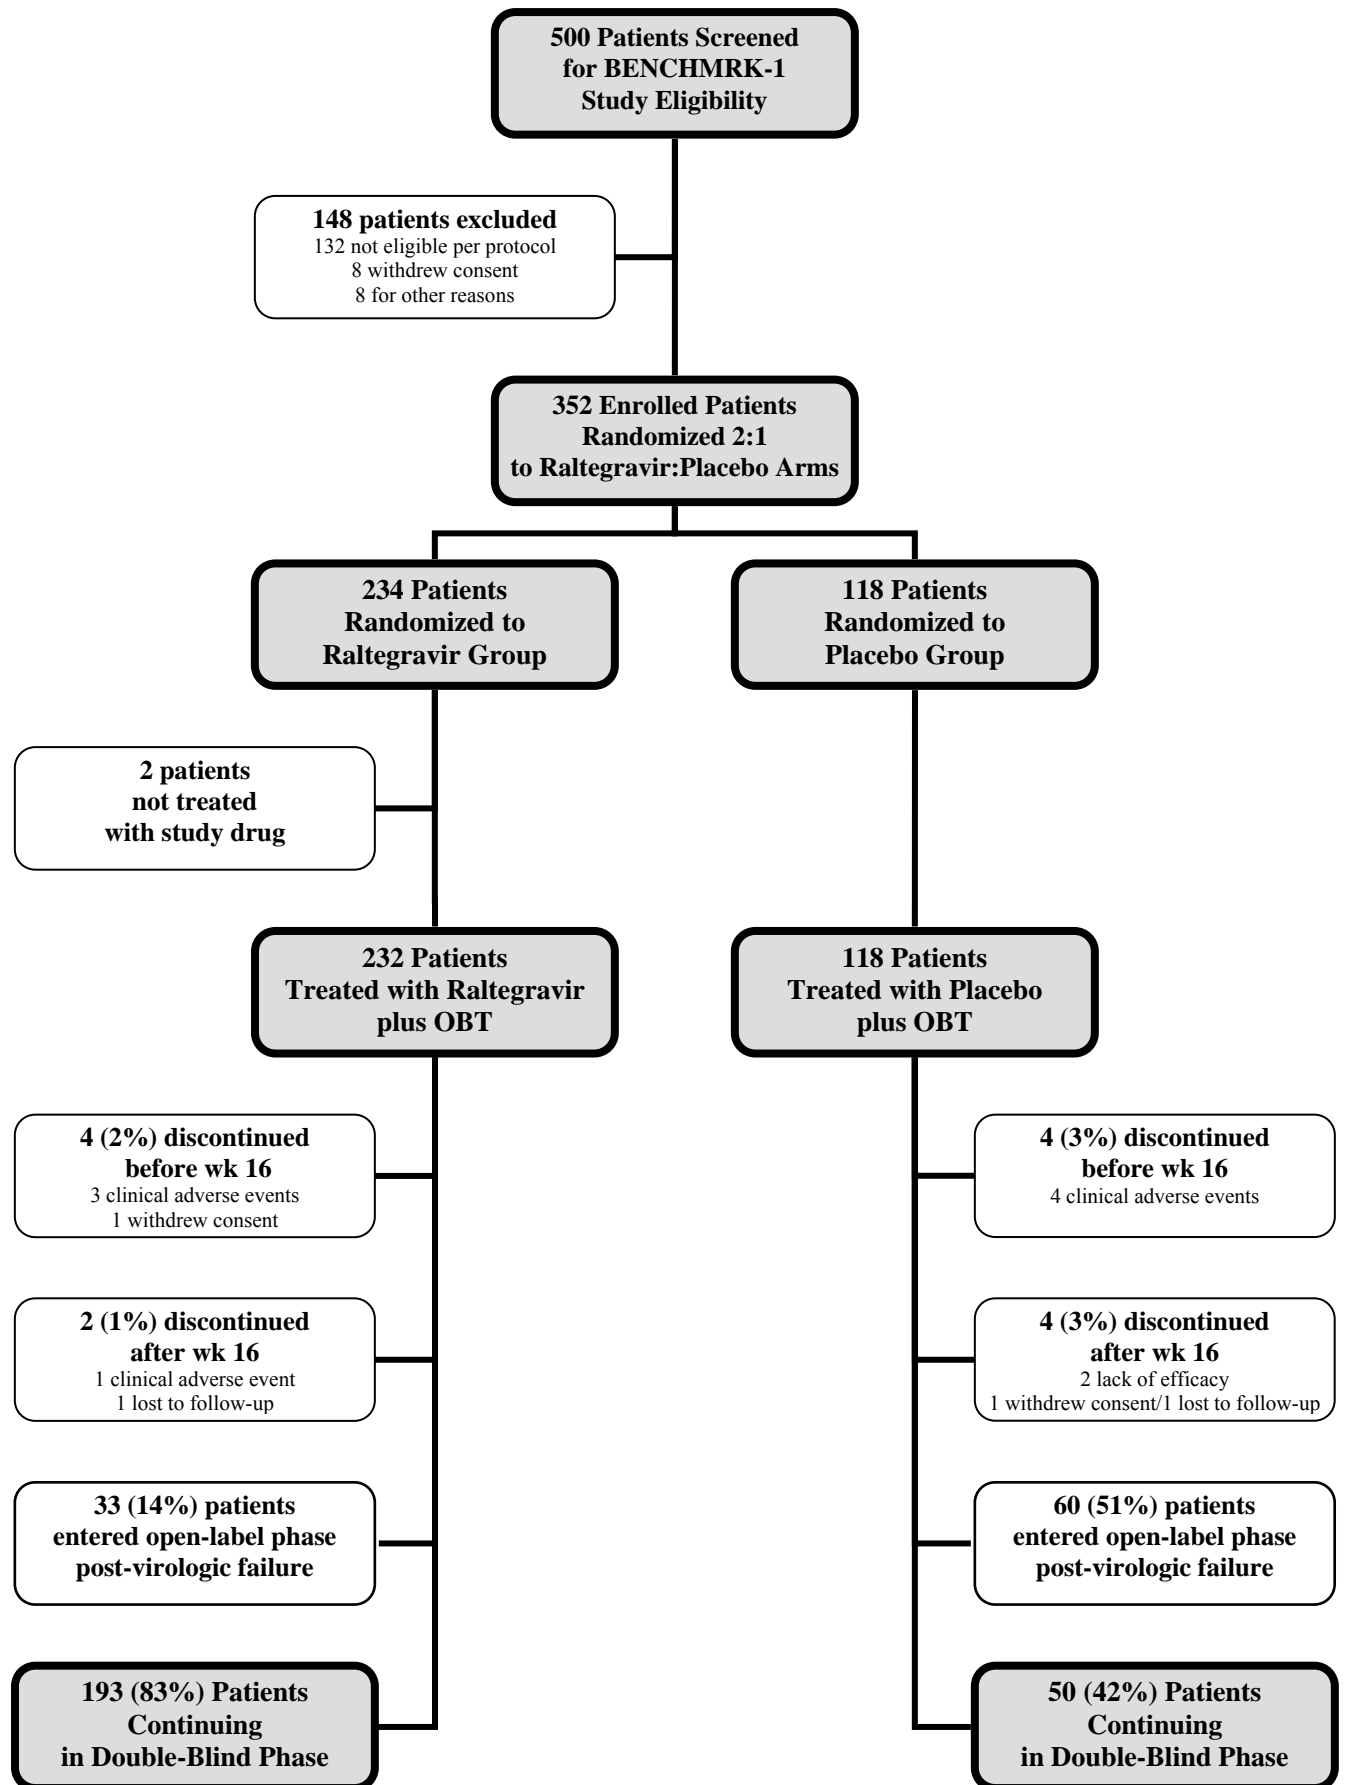

Supplemental Figure 1B. BENCHMRK-2

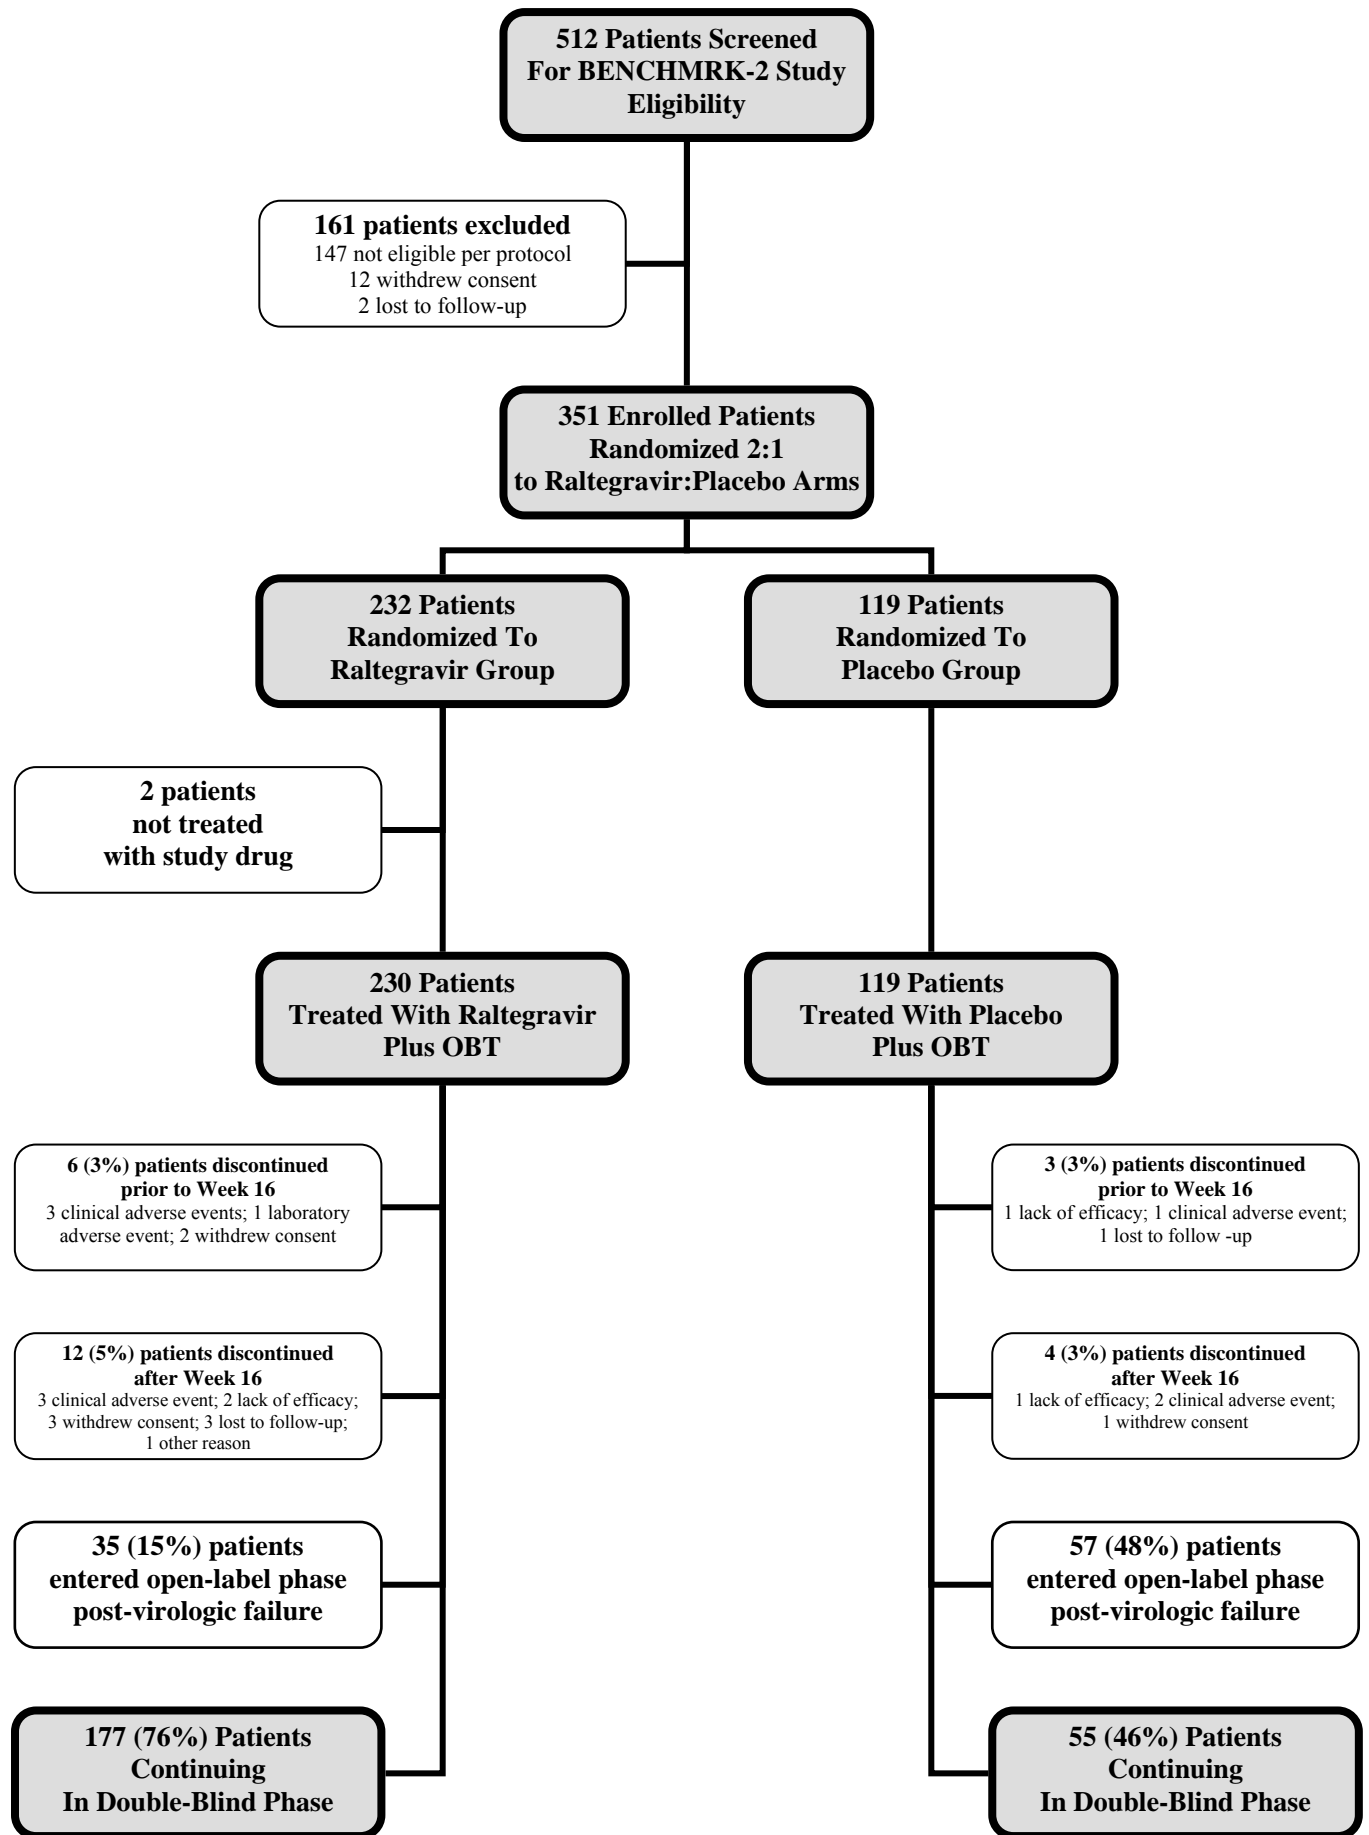

# Supplemental Figure 2.

## A. BENCHMRK-1

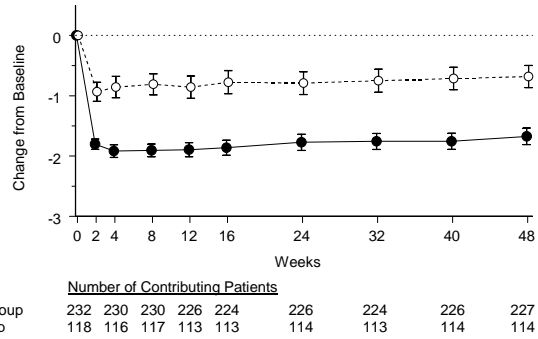

## B. BENCHMRK-2

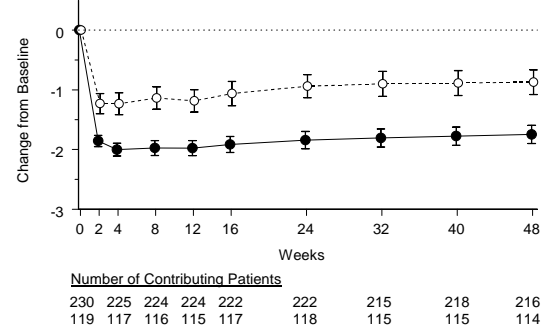

## C. Combined BENCHMRK Studies

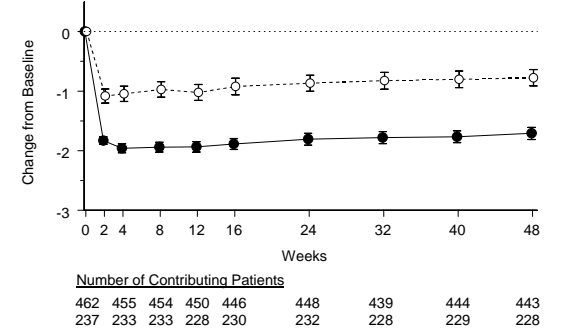

Mean change in vRNA levels (log<sub>10</sub> copies/mL)

Mean change in CD4 counts (cells/mm<sup>3</sup>)

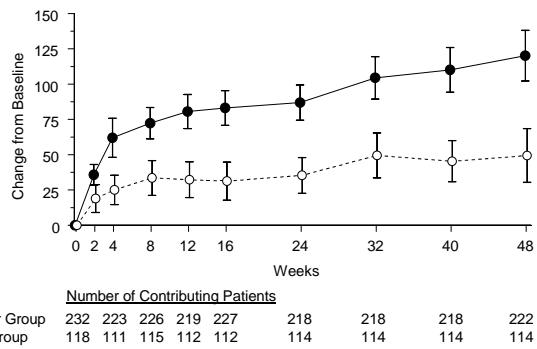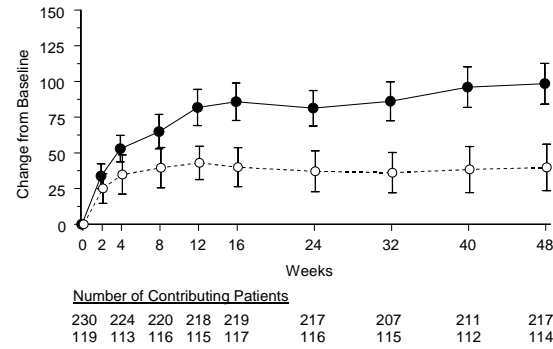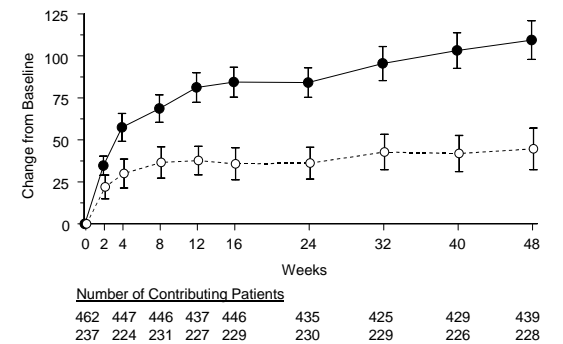

## FIGURE LEGENDS

Supplemental Figure 1. Subject accounting for BENCHMRK-1 (A) and BENCHMRK-2 (B)

Data regarding patient disposition are presented as of 3-August-2007 for BENCHMRK-1 and 31-July-2007 for BENCHMRK-2. The time point for the primary efficacy analysis was prespecified by protocol as study Week 16; full 48-week efficacy data are presented in this report. Subsequent to Week 16, patients with virologic failure could opt to remain in the blinded portion of the study, enter an open-label phase and receive raltegravir as part of a new regimen, or withdraw from the study. OBT, optimized background therapy.

Supplemental Figure 2. Change from baseline in vRNA levels and CD4-cell counts over time by treatment group for BENCHMRK-1 (A), BENCHMRK-2 (B), and the combined BENCHMRK studies (C)

The mean change in  $\log_{10}$  vRNA copies per mL and CD4-cell counts per  $\text{mm}^3$  from baseline are shown using the observed-failure approach, carrying baseline values forward (thereby assigning a value of 0 to change from baseline) for all failures. Vertical brackets represent the 95% confidence intervals.
